# Supplementary material for: Circulating Interlukin-32 and Altered Blood Pressure Control in Individuals with Metabolic Dysfunction
Source: MDPI journal article supplement (doi:10.3390/ijms24087465), 2023-04-18
Supplement: s1 [file s1]

## SUPPLEMENTARY MATERIAL

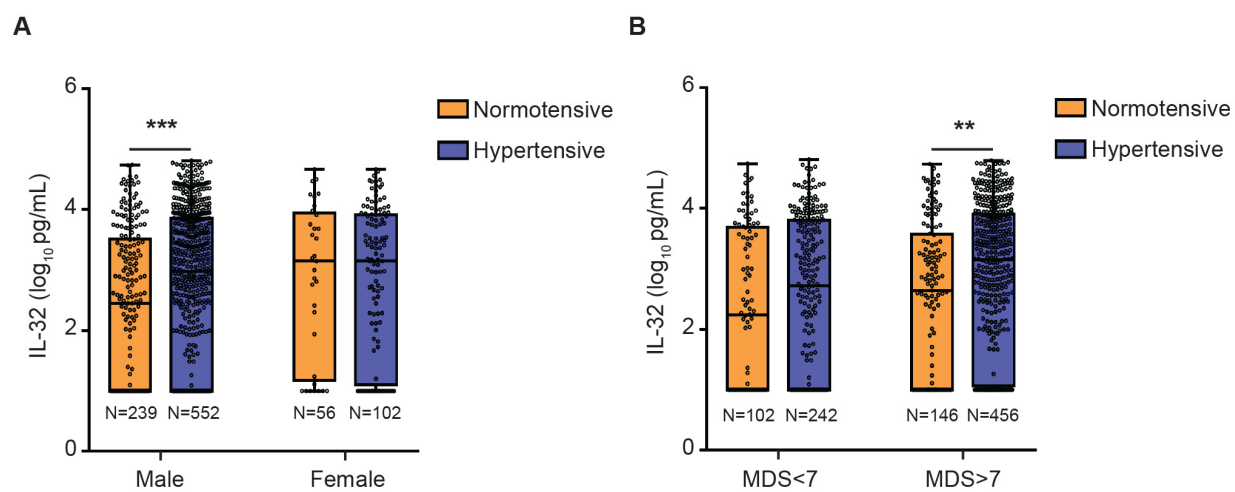

**Figure S1.** Panel A, B) Circulating IL32 levels gender- and MDS adherence-stratified. IL32 increased significantly in hypertensive male as well as in individuals with low score of Mediterranean diet adherence. P values: \*\*p value <0.01; \*\*\* p value <0.001.

## SUPPLEMENTARY TABLES

**Table S1.** Association between IL32 and altered blood pressure controls. stratified for clinically relevant subgroups.

|     |                           | N=  | Estimate | 95% c.i.       | p-value |
|-----|---------------------------|-----|----------|----------------|---------|
| FLD | Yes (CAP $\geq$ 275 dB/m) | 470 | +0.141   | 0.008 – 0.274  | 0.037   |
|     | No (CAP <275 dB/m )       | 479 | +0.190   | 0.059 – 0.321  | 0.004   |
| Sex | Male                      | 791 | +0.202   | 0.100 – 0.303  | 0.0001  |
|     | Female                    | 158 | -0.001   | -0.024 – 0.021 | 0.91    |
| MDS | >7                        | 595 | +0.078   | -0.071 – 0.176 | 0.20    |
|     | $\leq$ 7                  | 354 | +0.299   | 0.152 – 0.446  | 0.0004  |

At logistic regression models adjusted for abdominal circumference. FLD: fatty liver disease; MDS: Mediterranean Diet Score.

**Table S2.** Independent dietary determinants (individual Mediterranean Diet Score items) of circulating IL-32 concentration in 949 participants with metabolic dysfunction in the Liver-Bible-2021 Cohort.

|                                                   | Estimate | Lower CL | Upper CL | P value |
|---------------------------------------------------|----------|----------|----------|---------|
| <1 portion of sugar or sparkling drinks / day, No | -0.128   | -0.282   | 0.0267   | 0.10    |
| <1 portion butter/ day, Yes                       | 0.013    | -0.097   | 0.123    | 0.81    |
| White meats replace red meats, No                 | -0.024   | -0.107   | 0.058    | 0.56    |
| <1 portion of red meat, day, No                   | -0.064   | -0.28    | 0.154    | 0.56    |
| <3 sweet servings/ week, No                       | 0.059    | -0.029   | 0.148    | 0.19    |
| $\geq$ 3 portions of fruit/ day, No               | 0.063    | -0.029   | 0.155    | 0.18    |
| $\geq$ 3 portions of legumes/ week, Yes           | 0.102    | 0.006    | 0.198    | 0.038*  |
| >1 serving of nuts/ week, Yes                     | 0.100    | 0.017    | 0.184    | 0.018*  |
| $\geq$ 4 tablespoons oil/ day, Yes                | 0.047    | -0.043   | 0.137    | 0.30    |
| Olive oil as main fat, No                         | -0.023   | -0.315   | 0.269    | 0.87    |
| $\geq$ 2 simple pasta or rice dishes/ week, No    | -0.000   | -0.174   | 0.173    | 0.99    |
| $\geq$ 3 portions of fish/ week, No               | 0.066    | -0.041   | 0.172    | 0.22    |
| $\geq$ 2 servings vegetables/ day, No             | -0.049   | -0.13    | 0.038    | 0.27    |
| $\geq$ 3 glasses of wine/ week, Yes               | -0.071   | -0.154   | 0.011    | 0.092   |

At generalized linear models adjusted for each Mediterranean Diet Score item, plus abdominal circumference and systolic blood pressure.
